## **Rescuing auditory temporal processing with a novel augmented acoustic environment in a mouse model of congenital SNHL**

Authors: Adam C. Dziorny<sup>1</sup>, Luisa L. Scott<sup>4</sup>, Anne E. Luebke<sup>1,2</sup>, and Joseph P. Walton<sup>3</sup>

Departments of Biomedical Engineering<sup>1</sup> and Neurosicence<sup>2</sup>, University of Rochester Medical Center, Rochester NY 14642, Departments of Communication Sciences and Disorders, Chemical and Biomedical Engineering and Global Center of Speech and Hearing Research<sup>3</sup>, University of South Florida, Tampa, FL 33620, Cognosetta, Inc.<sup>4</sup> Tampa, FL 33620

Running Head: Improved Temporal Processing Following AAE Exposure

Corresponding Author:

Joseph P. Walton, PhD  
Communication Sciences and Disorders, PCD 1017  
University of South Florida  
4202 E. Fowler Ave  
Tampa FL 33620  
Phone: 813-974-4080 Email: [jwalton1@usf.edu](mailto:jwalton1@usf.edu)

## **Abstract**

Congenital sensorineural hearing loss (SNHL) affects thousands of infants each year and results in significant delays in speech and language development. Previous studies have shown that early exposure to a simple augmented acoustic environment (AAE) can limit the effects of progressive SNHL on hearing sensitivity. However, SNHL is also accompanied by “hidden hearing loss” that is not assessed on standard audiological exams, such as reduced temporal processing acuity. To assess whether sound therapy may improve these hidden deficits, a mouse model of congenital SNHL was exposed to simple or temporally complex AAE. Peripheral function and sound sensitivity in auditory midbrain neurons improved following exposure to both types of AAE. However, only exposure to a novel, temporally complex AAE significantly improved a measure of temporal processing acuity, neural gap-in-noise detection in the auditory midbrain. These experiments suggest that targeted sound therapy may improve hearing outcomes for children suffering from congenital SNHL.

Keywords: Augmented Acoustic Environment, Temporal Processing, Congenital SNHL, Inferior Colliculus

## 2 **Introduction**

3 Early childhood sensorineural hearing loss (SNHL) is a common neurosensory disability  
4 causing significant medical, social and financial hardship. The prevalence of moderate-to-  
5 profound SNHL in children (> 40 dB) is roughly 3 in 1,000, with up to 10% have hearing loss that  
6 is considered “profound”<sup>1-4</sup>. There are numerous causes of congenital or acquired sensorineural  
7 hearing loss, including genetic factors, infectious diseases, or environmental toxins. Beyond  
8 hearing threshold deficits seen in children with SNHL, studies have also shown functional deficits  
9 in the development of speech and language processing<sup>5-9</sup>. Impairments in speech perception,  
10 which may give rise to these functional deficits, have been associated with restricted encoding of  
11 auditory temporal cues<sup>10</sup>.

12 Psychoacousticians have used the gap detection paradigm to evaluate temporal processing  
13 acuity of sounds for more than 30 years. Gap detection acuity may underlie perceptual boundaries  
14 in natural language, such as voiced versus voiceless speech sounds. Minimal gap thresholds  
15 (MGT) appear to determine the perceptual boundary in the continuum of voice onset times  
16 (VOTs), the intervals between consonant release and the start of vocal cord vibration in consonant-  
17 vowel transitions<sup>11</sup>. Gap detection acuity is also linked to speech recognition abilities<sup>12</sup>, as well  
18 as normal language development<sup>13, 14</sup>. In animal models, gap detection can be assessed using  
19 several different behavioral techniques<sup>15, 16</sup>, and can also be measured neurophysiologically to  
20 assess neural sound encoding. Interestingly, nearly all mammals have similar behavioral MGTs,  
21 which are on the order of 2-3 ms; the lowest neural MGTs approximate these behaviorally-assessed  
22 MGTs<sup>17</sup>.

23 There are several mouse models of congenital SNHL that mimic the different types and  
24 progression of hearing loss that occur in humans. The DBA strain, the oldest inbred mouse strain

25 <sup>18</sup>, contains a mutation in the gene, *Cdh23* <sup>19</sup>, as well as a nucleotide substitution in *Fscn2* that is  
26 the cause of the *ahl8* quantitative trait locus <sup>20, 21</sup>. This strain shows a rapid, progressive loss of  
27 peripheral function beginning at the onset of hearing <sup>22, 23</sup>, displaying many of the audiometric  
28 characteristics found in infants with progressive SNHL <sup>24</sup>. DBA mice have early and rapid loss of  
29 outer hair cell (OHC) function in a base to apex progression, as measured by distortion product  
30 otoacoustic emission (DPOAE) thresholds <sup>25</sup>.

31 Previous studies have shown that when newborn DBA mice are exposed to broadband  
32 sounds daily during 12-hour on/off cycles, improvements are seen in peripheral function <sup>26, 27</sup>,  
33 preserving hearing sensitivity and limiting hair cell loss <sup>28</sup>. The mechanism through which the  
34 slowing of the degenerative processes occurs is unknown but perhaps the AAE maintains afferent  
35 neuronal input to the central auditory system (CAS) <sup>29</sup>. An augmented acoustic environment  
36 (AAE) exposure also limits neuronal loss in the cochlear nucleus <sup>28</sup> and expands the frequency  
37 range to which IC neurons are sensitive across the dorsoventral axis compared to non-exposed  
38 mice <sup>30</sup>. When normal-hearing, young adult CBA mice are exposed to AAE no effects, positive  
39 or negative, are observed <sup>31</sup>. Clearly, in mouse models of congenital SNHL, AAE exposure shows  
40 promise in ameliorating the effects of rapid, progressive SNHL on loss of hearing sensitivity.  
41 However, whether AAE exposure can ameliorate other aspects of auditory dysfunction associated  
42 with SNHL has yet to be studied. The goal of the current study was to test the hypothesis that  
43 exposure to targeted AAE having complex temporal sound features would improve neural  
44 correlates of gap encoding in the CAS.

45

## 46 **Materials and Methods**

### 47 *Animal Model*

48           The DBA/2J mouse strain has served as a mouse model of early-onset severe hearing loss  
49 for over 4 decades<sup>22, 23, 32</sup>. Founder breeding pairs (JAX 000671) were obtained from Jackson  
50 Labs (Bar Harbor, ME) and our colony was maintained in micro-isolator facilities in the  
51 institutional vivarium. Mice were housed in rodent micro-isolator cages and provided *ad lib* food  
52 and water. Lights in the room were on a 12-hr light/dark cycle. Cages were changed at least weekly  
53 and mice were monitored for signs of distress by trained vivarium technicians. Breeder pairs were  
54 kept separate from experimental mice; only nulliparous mice were used for experiments. Both  
55 control and exposed pups were weaned into gender-separated cages between ages postnatal day  
56 (P) P21 and P28. All mice in this study were between 1<sup>st</sup> and 4<sup>th</sup> generation Jackson Labs breeder  
57 mice offspring. All procedures were approved by the University of Rochester's Committee on  
58 Animal Resources and in strict accordance with the National Institutes of Health Guide for the  
59 Care and Use of Animals.

60

#### 61 *AAE Exposure*

62           Mice were exposed using the same amplifier and sound source as described previously<sup>26</sup>  
63 (generously provided by Dr. Jeremy Turner). Cages were housed inside a sound-attenuating  
64 chamber (~ 3 feet wide x 2 feet deep x 5 feet high) covered with anechoic foam, and the booth  
65 itself was housed in a 2-way vivarium room. Stimulus presentation was calibrated *in situ* to 70 dB  
66 SPL using a Quest 1900 Sound Level Meter and an ACO Pacific ¼" free-field microphone (Figure  
67 1A). The spectrum of regular AAE (R-AAE) exposure was recorded using an HP/Agilent 35665A  
68 Spectrum Analyzer (Hewlett Packard). The analysis revealed a wide-band noise  $\pm$  6 dB from 4 –  
69 20 kHz (Figure 1B). Ambient noise levels were between 39 – 45 dB SPL in this frequency range.  
70 Our novel temporal AAE (T-AAE) stimulus was generated from a subsection of the wav file

71 containing our original stimulus (Figure 1C), with additional silent gaps inserted within the noise  
72 bursts, as follows. Random gap durations of 0, 1, 2, 4, 8 or 16 ms were inserted into the wave  
73 vector 100 ms into each 200-ms noise burst, and the remaining noise burst was shortened by the  
74 same gap duration to preserve the 40% duty cycle. The resulting wave vector was saved and  
75 utilized for temporal AAE stimulus presentation (Figure 1C).

76 AAE exposure began just after birth, before the onset of hearing at around P10<sup>33</sup> matching  
77 previous studies in the DBA model<sup>26, 28, 31</sup>. All mice in this study were tested at 30 days after  
78 birth, following at least 18 days of AAE exposure. This time point was chosen because control  
79 mice of this strain already show significant hearing loss by this time<sup>22, 23, 26</sup>.

80

#### 81 *Peripheral Auditory Assessment*

82 Auditory brainstem responses (ABRs) were recorded using BioSigRP software (version  
83 4.4.1, Tucker-Davis Technologies, Alachua, FL) interfacing with Tucker-Davis Technologies  
84 (TDT) System III hardware. ABR waveforms were recorded in response to tone bursts of 5 ms  
85 duration, shaped by a Blackman window. The frequencies tested were 3, 6, 12, 16, 20, 24, 32 and  
86 36 kHz for each animal. Stimuli were presented at a rate of 25 / second, with 150 averages per  
87 waveform, with replication. Artifact rejection was enabled with a threshold of 7  $\mu$ V. Each  
88 frequency was presented beginning at a level of 80 dB SPL down to 20 dB below threshold, in 5-  
89 dB increments. The recorded waveforms were amplified ( $\times 10,000$ ), filtered (0.3 – 10 kHz) and  
90 digitized. No mice (control or experimental) responded to test frequencies  $> 24$  kHz, and therefore  
91 these frequencies were omitted from the ABR analysis.

92 Distortion product otoacoustic emissions (DPOAE) amplitudes were measured using  
93 custom MATLAB (Mathworks) software interfacing with TDT System III hardware, calibrated

94 similar to the ABR acquisition hardware. The speaker transduction tube / ER10B microphone  
95 apparatus was lowered into the ear canal of the anesthetized mouse using a micromanipulator under  
96 microscopic examination. Two separate placements & recordings were completed on each mouse;  
97 if the results differed, a third placement and recording was completed. The pair of matching results  
98 was averaged during analysis. DPOAE amplitudes were recorded in response to two simultaneous  
99 pure-tone bursts ( $f_1$  and  $f_2$ ) at different frequencies, related with the following ratio:  $f_2 / f_1 = 1.25$ .  
100 The lower-frequency tone ( $f_1$ ) was presented at 65 dB and the higher-frequency tone ( $f_2$ ) was  
101 presented at 50 dB. The geometric mean presentation frequencies were from 5.6 – 20.5 kHz.  
102 Amplitudes were transformed to the frequency domain and the cubic distortion product ( $2f_1 - f_2$ )  
103 and surrounding noise values were measured. DPOAE responses could not be distinguished from  
104 the noise floor above 22 kHz in any group, and these frequencies were not analyzed.

105

### 106 *Auditory Midbrain Neurophysiology*

107 We recorded neuronal activity in the inferior colliculus (IC) using a 16-channel vertically-  
108 oriented electrode (a1x16-3mm-100-177 $\mu\text{m}^2$ , NeuroNexus Technologies) with 100  $\mu\text{m}$  spacing  
109 between pads and impedances of 1 – 3 M $\Omega$ . Electrodes were positioned over the craniotomy and  
110 advanced ventrally by a micromanipulator. The electrical output was amplified, filtered and  
111 digitized at 25 kHz in a 1.25 ms time window. Neural activity was automatically determined using  
112 a 3:1 SNR.

113 Stimuli were generated using DSP software (OpenEX and RPVDS, TDT) and presented  
114 through TDT System III hardware to an electrostatic speaker (TDT ES1). The speaker was located  
115 at a 60° azimuth contralateral to the recording site. Stimulus presentation was controlled by  
116 custom MATLAB routines interfacing through OpenEx interfaced to an RX6. First, search stimuli

117 were presented to locate responsive units and identify events. These stimuli were band-limited  
118 noise bursts (3 – 50 kHz) presented at 70 dB SPL at a rate of 2 / second. Second, tone burst stimuli  
119 (25-ms in duration, 10 / sec) were presented to measure frequency response areas (FRA). The  
120 range of frequencies used in this study was 2 – 64 kHz (500 Hz increments) and the range of levels  
121 was 0 – 85 dB SPL (5 dB increments). Each frequency-level pair was presented five times, with  
122 the entire set randomized prior to presentation. Third, to assess gap-in-noise encoding noise bursts  
123 of 100 ms (noise burst 1, NB1) and 50 ms (noise burst 2, NB2) were delivered at a rate of 2 / sec.  
124 The level was fixed at the start of each run to 80, 70, or 60 dB SPL, as these intensities were  
125 predicted to be >20 dB higher than the noise threshold for individual units. Silent gaps in the noise  
126 burst were inserted (0.25 msec rise-fall) after the first 100 ms of the first noise burst (NB1), with  
127 the gap duration being one of the following: 0, 1, 2, 4, 8, 16, 32, 64, or 96 ms. Continuous  
128 background noise (CBN) was used to further test the benefits of AAE exposure. CBN (3-50 kHz)  
129 could be applied to a gap series at a fixed level (+6 dB SNR) whereby the silent gap would also be  
130 filled with this continuous background noise at a level of 6 dB below the noise carrier. Each gap  
131 duration was repeated 50 times, for a total of 500 repetitions (10 gap durations x 50 repetitions per  
132 duration).

133

#### 134 *Spike Sorting and Response Measures*

135 Spike waveforms were processed in MATLAB® using the TDT OpenDeveloper ActiveX  
136 controls and passed to AutoClass C v3.3.4, an unsupervised Bayesian classification system that  
137 seeks a maximum posterior probability classification, developed at the NASA Ames Research  
138 Center<sup>34</sup>. AutoClass scans the dataset of voltage–time waveforms according to custom specified  
139 spike parameters to produce the best-fit classifications of the data, which may include distinct



140 single- and multi-unit events, as well as noise. To discriminate the signal from noise, the variance  
141 of the background noise was estimated as the quartile range of the first five digitization points of  
142 the spike waveform, as these are recorded prior to the threshold-crossing event. To avoid  
143 overloading AutoClass with excessive noise, which leads to over-classification, this noise measure  
144 was used to screen the event waveform data such that only voltage points with absolute values  
145 greater than this noise floor were presented for use in the classification. Once the classes had been  
146 determined in each channel of data, they were visualized within a custom MATLAB® program  
147 and assigned to multi-unit, single-unit, or noise classes. Event classes which were categorized as  
148 noise were subsequently discarded, and units with distinct biphasic waveforms and good SNR  
149 were classified as single-units. As most channels recorded information elicited from the spiking of  
150 two or more neurons, all recordings units in this paper were considered to be multi-unit activity<sup>35</sup>.  
151 Nonetheless, there was no observation of any consistent differences in the eFRAs between single  
152 units and multi-unit clusters.

153 Data analysis was performed as previously described<sup>36</sup>. Frequency response areas (FRAs)  
154 were displayed in a custom MATLAB GUI and analyzed with a multi-step procedure using custom  
155 software. Frequency receptive fields (FRAs) were then used to determine the best frequency (BF),  
156 the frequency with the lowest intensity of driven activity, and tuning sharpness. For units with  
157 sound driven activity, assessed within the FRA, neural responses to gap-in-noise were visualized  
158 using a custom Matlab GUI, and minimum gap thresholds (MGTs) were determined using  
159 previously-published methods<sup>37, 38</sup>. Only gap-responsive units (with  $MGT \leq 96$  ms) for each  
160 stimulus condition were included in subsequent analysis of gap detection. Additionally, the  
161 analysis focuses on phasic units because tonic units recorded in continuous background noise  
162 demonstrated post-excitatory suppression. Due to this post-excitatory suppression, the quiet

163 window responses of tonic units were not strictly a result of the embedded silent gap, making MGT  
164 determination highly variable and unreliable.

165

### 166 *Statistical Analysis*

167 Table 1 reports the number of mice that underwent ABR, DPOAE, and IC recordings, and  
168 the number of IC units included in each measure of neural sound processing. Mice with DPOAE  
169 recordings were a subset of mice with ABR recordings; however, mice that underwent IC  
170 recordings did not always have peripheral assessment. Auditory processing measures are reported  
171 as mean  $\pm$  standard error of the mean and statistical comparisons were made using GraphPad Prism  
172 v6.0. The Student's t-test compared differences between two groups, while Analysis of Variance  
173 (ANOVA) with Bonferroni *post-hoc* testing compared the effect of one or more variables. The Chi  
174 Square or Fischer's Exact test was used to examine differences between observed and expected  
175 counts. Significance was set at  $p < 0.05$ .

176

## 177 **Results**

### 178 *Peripheral Auditory Assessment*

179 ABRs were recorded to determine the effect of early AAE exposure beginning at the onset  
180 of hearing. ABR thresholds were assessed as a function of Exposure and Frequency (Figure 2A,  
181 D). A two-way ANOVA demonstrated significant effects of Exposure ( $F = 23.46$ ,  $p < 0.001$ ),  
182 Frequency ( $F = 121.10$ ,  $p < 0.001$ ) and Exposure x Frequency ( $F = 5.71$ ,  $p < 0.001$ ) with post AAE  
183 thresholds from exposed mice being significantly improved as compared to control mice. Post-hoc  
184 analysis showed significant improvement in ABR thresholds at 12 and 16 kHz following either  
185 type of AAE exposure, and no significant differences between the two types of AAE exposure.

186 The magnitude of the difference in ABR thresholds for control and AAE-exposed mice approached  
187 30 dB at 16 kHz (Control vs. Regular AAE: 29 dB; Control vs. Temporal AAE: 26 dB), a  
188 frequency in the range of the best hearing for CBA mice. While the difference did not reach  
189 statistical significance, at 24 kHz we encountered very few mice from the Control group that had  
190 observable responses at 80 dB (3 / 20, or 15%), when compared to the Regular AAE (6 / 16, or  
191 38%) or Temporal AAE groups (7 / 15, or 46%). Together, these findings indicate that ABR  
192 thresholds improved following exposure to both types of AAE (Figure 2A, D), replicating the  
193 findings of Turner and Willott (1998). Moreover, the frequency range that showed the most  
194 improvement in ABR thresholds was within the region of maximal energy for the AAE exposure  
195 spectrum and with the frequency region of best hearing sensitivity.

196

**A**

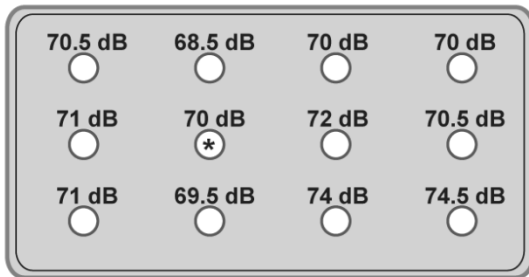

**B**

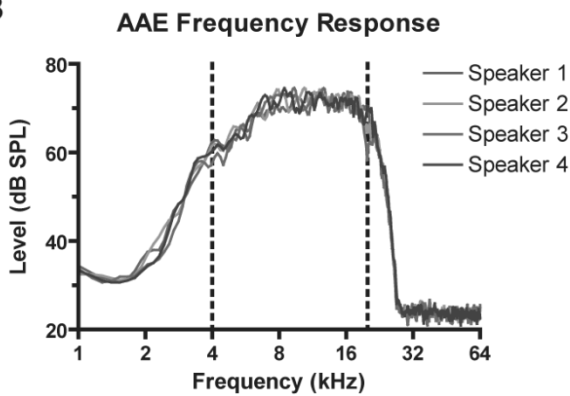

**C**

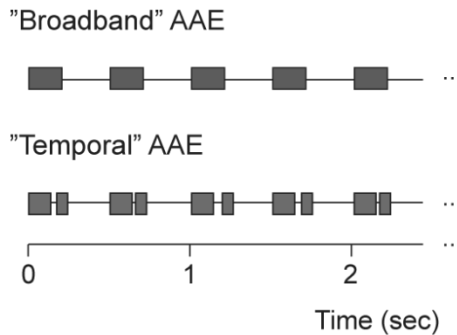

197 **Figure 1.** Exposure calibration, stimulus spectrum and temporal pattern. **A**, Sound levels recorded  
198 at different points in the cage (circles, spaced approx. 3.5" apart) in response to calibrated AAE  
199 stimulus. Asterisk denotes hole calibrated to 70 dB SPL. **B**, The frequency response spectrum of  
200 the AAE stimulus, presented through each speaker used during exposure, demonstrates a flat  
201 region ( $\pm 6$  dB) from 4 – 20 kHz (indicated with dashed lines). The spectrum was recorded with  
202 a  $\frac{1}{2}$ " ACO Pacific microphone on a Quest 1900 sound level meter output to an HP/Agilent 35665A  
203 spectrum analyzer. Each waveform consisted of 30 averages. **C**, Schematic of regular and  
204 temporal augmented acoustic environment exposure. Each exposure was presented twice per  
205 second, 200 ms per burst, for 12 hrs / day. Temporal AAE stimulus had a silent gap (either 0, 1,  
206 2, 4, 8 or 16 ms in duration) inserted after the first 100 ms.

|                               | <b>Control</b> | <b>Regular</b> | <b>Temporal</b> |
|-------------------------------|----------------|----------------|-----------------|
|                               |                | <b>AAE</b>     | <b>AAE</b>      |
| <i>Periphery (# Mice)</i>     |                |                |                 |
| ABRs                          | 20             | 16             | 15              |
| DPOAEs                        | 13             | 12             | 8               |
| <i>Auditory Midbrain</i>      |                |                |                 |
| # Mice                        | 11             | 11             | 10              |
| Total # Units Recorded        | 825            | 932            | 904             |
| Frequency Response Areas (%)  | 574 (69.6)     | 702 (75.3)     | 629 (69.6)      |
| 80 dB Gap-Responsive (%)      | 507 (61.5)     | 595 (63.8)     | 567 (62.7)      |
| 80 dB Phasic Units (%)        | 242 (29.3)     | 192 (20.6)     | 267 (29.5)      |
| 80 dB Gap-In-Noise Responsive | 173 (21.0)     | 134 (14.4)     | 210 (23.2)      |
| 70 dB Phasic Units (%)        | 204 (24.7)     | 184 (19.7)     | 234 (25.9)      |
| 60 dB Phasic Units (%)        | 96 (11.6)      | 170 (18.2)     | 188 (20.8)      |

**Table 1.** Counts of animals tested and units isolated. For peripheral measures, counts are given in terms of the number of animals tested. For central auditory recording, counts are listed in terms of the number of animals as well as the number of units recorded from these animals. Percent values are listed as percent of total units recorded for each exposure type.

207           The amplitude and latency of wave I in the ABR waveform was measured in response to a  
208 12 kHz tone presented at 80 dB SPL (Figure 2B, C). Wave I amplitudes (Figure 2B) demonstrated  
209 a significant effect of Exposure ( $F = 5.94$ ,  $p = 0.0118$ ). Post-hoc group comparisons reveal wave  
210 I amplitudes were significantly greater for temporal AAE-exposed mice than controls ( $4.3 \pm 1.1$   
211  $\mu\text{V}$  compared to  $9.9 \pm 0.8 \mu\text{V}$ ,  $p < 0.05$ ). Mean wave I amplitude was also greater for regular  
212 AAE-exposed mice ( $6.7 \pm 1.1 \mu\text{V}$ ) than controls, though the difference did not reach significance.  
213 Although the mean wave I latencies were physiologically similar across groups, differing by only  
214 170  $\mu\text{sec}$  (Control:  $2.98 \pm 0.03$  ms; Regular AAE:  $2.96 \pm 0.03$  ms; Temporal AAE:  $3.13 \pm 0.03$   
215 ms; Figure 2C) the one-way ANOVA demonstrated a significant effect of Exposure ( $F = 6.81$ ,  $p$   
216  $= 0.007$ ). Together these findings indicate the temporal AAE exposure had a more substantive  
217 effect on wave I ABR measures of cochlear sound processing than regular AAE exposure.

218           DPOAE amplitudes were measured in mice following exposure to regular or temporal  
219 AAE versus control environments to assess outer hair cell function (Figure 2E). A two-way  
220 ANOVA found significant effects for Exposure ( $F = 109.00$ ,  $p < 0.001$ ), Frequency ( $F = 17.98$ ,  $p$   
221  $< 0.001$ ) and Exposure x Frequency ( $F = 5.25$ ,  $p < 0.001$ ). Post-hoc group comparisons revealed  
222 that DPOAE amplitudes increased at geometric mean frequencies between 10 – 17 kHz for both  
223 groups of AAE exposure relative to control (mean increase for pooled AAE-exposure responses:  
224  $21.2 \pm 1.4$  dB,  $p < 0.05$ ). Temporal AAE exposure resulted in an even larger impact on DPOAE  
225 amplitudes than regular AAE exposure. Post-hoc group comparisons revealed that DPOAEs  
226 elicited by 17.27 and 18.84 kHz tones were significantly larger (by 13 dB) in temporal AAE-  
227 exposed animals compared to regular AAE-exposed animals ( $p < 0.05$ ). Thus, similar to the ABR  
228 analysis, the DPOAE analysis showed the greatest impact of AAE exposure on cochlear function

## Improved Temporal Processing Following AAE Exposure

13

229 for stimuli in the frequency region with maximal AAE energy. Additionally, Temporal AAE  
230 exposure was moderately more effective at improving DPOAE measures of cochlear function.

231

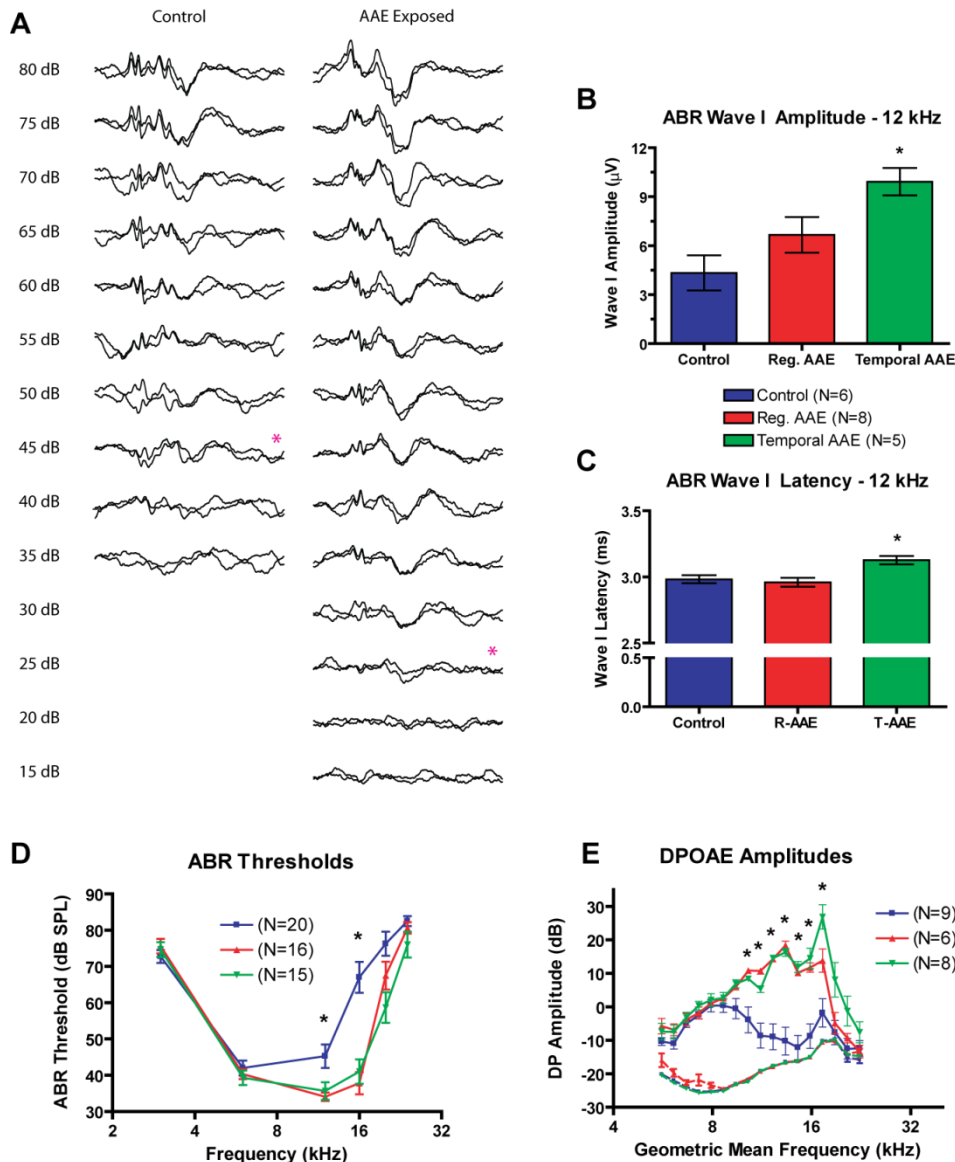

232 **Figure 2.** AAE exposure improves peripheral function at P30. **A**, Representative ABR waveforms  
 233 from a control and AAE-exposed animal at 12 kHz show similar suprathreshold morphology, with  
 234 an elevated threshold in the control animal. **B**, ABR wave I amplitudes were increased in both  
 235 exposure types compared to controls (Control [blue]:  $4.3 \pm 1.1 \mu\text{V}$ ; Reg. AAE [red]:  $6.7 \pm 1.1 \mu\text{V}$ ;  
 236 Temporal AAE [green]:  $9.9 \pm 0.8 \mu\text{V}$ ), though only responses from temporal AAE exposure  
 237 reached significance ( $p < 0.05$ ). **C**, ABR wave I latencies were similar in magnitude (Control:  $2.98$   
 238  $\pm 0.03$  ms; Reg. AAE:  $2.96 \pm 0.03$  ms; Temporal AAE:  $3.13 \pm 0.03$  ms). Temporal AAE-exposed  
 239 mice had significantly longer latency compared to control mice ( $p < 0.05$ ) and regular AAE mice  
 240 ( $p < 0.01$ ). **D**, ABR thresholds were significantly decreased at 12 & 16 kHz following exposure  
 241 to both types of AAE (Regular = red, Temporal = green) compared to controls (blue,  $p < 0.001$ ).  
 242 At the frequency of greatest differences (16 kHz), this difference approaches 30 dB. No responses  
 243 were noted above 24 kHz in any group. **E**, DPOAE amplitudes were increased following exposure  
 244 to both types of AAE (Regular = red, Temporal = green) compared to controls (blue), with larger  
 245 increases seen at select frequencies following temporal AAE exposure. Between 10 and 17 kHz,



246 both types of AAE exposure significantly increased amplitudes (mean increase:  $21.2 \pm 1.4$  dB,  $p$   
247  $< 0.01$ ). Additionally, temporal AAE exposure resulted in a 13 dB amplitude increase over regular  
248 AAE exposed mice at two test frequencies (17.27 & 18.84 kHz). Amplitudes could not be  
249 distinguished from the noise floor above 22 kHz in any group.

250 *Central Auditory Function*

251 To determine whether AAE exposure can influence neural markers of spectral or temporal  
252 auditory processing acuity, we measured the response of IC neurons to sound stimuli in vivo. To  
253 our knowledge this is the first description of the effects of AAE on neural coding of complex  
254 sounds in the CAS. Exposure to AAE altered the frequency response properties for IC units when  
255 compared to units from control, unexposed animals (Figure 3A-D). One-way ANOVAs  
256 demonstrated that exposure to AAE resulted in a significant upward shift in BF ( $F = 43.16$ ,  $p <$   
257  $0.001$ ) and a significant improvement in minimum threshold ( $F = 15.46$ ,  $p < 0.001$ ) of neurons  
258 from AAE groups. Group comparisons revealed that both types of AAE exposure significantly  
259 increased the upward frequency boundary of BFs relative to Control values (Reg. AAE:  $14.2 \pm 0.2$   
260 kHz; Temporal AAE:  $15.1 \pm 0.2$  kHz; Control:  $12.4 \pm 0.2$  kHz;  $p < 0.001$ ), with no further  
261 differences between regular and temporal AAE exposure groups (Figure 3B). Likewise, both types  
262 of AAE exposure significantly improved minimal response threshold, with no further effect of  
263 AAE exposure group (Figure 3C). Finally, exposure to either type of AAE sharpened tuning of the  
264 FRAs, assessed by measuring Q-values for the FRA between 10 and 40 dB above threshold. One-  
265 way ANOVAs demonstrated a significant effect of Exposure for  $Q_{10}$  through  $Q_{40}$  values ( $Q_{10}$ :  $F =$   
266  $28.81$ ;  $Q_{20}$ :  $F = 43.46$ ;  $Q_{30}$ :  $F = 34.09$ ;  $Q_{40}$ :  $F = 48.58$ ;  $p < 0.001$ ). A higher Q-value indicates  
267 sharper tuning, and group comparisons showed that  $Q_{10}$  through  $Q_{40}$  values following either type  
268 of AAE exposure were higher than control values ( $Q_{10}$  shown in Figure 3D). The mean magnitude  
269 of the difference between control and AAE exposure groups at  $Q_{10}$  is approximately 1, which at a  
270 BF of 12 kHz equates to a bandwidth difference of about 1 kHz (or 25% of the Control group  
271 mean). No other significant differences were found with respect to frequency receptive fields  
272 between exposure types. These findings indicate that in AAE-exposed mice, IC neurons had lower

## Improved Temporal Processing Following AAE Exposure

17

- 273 thresholds and were more responsive to higher frequencies, but were also more narrowly tuned.
- 274 The type of AAE exposure did not influence these improvements in spectral acuity.

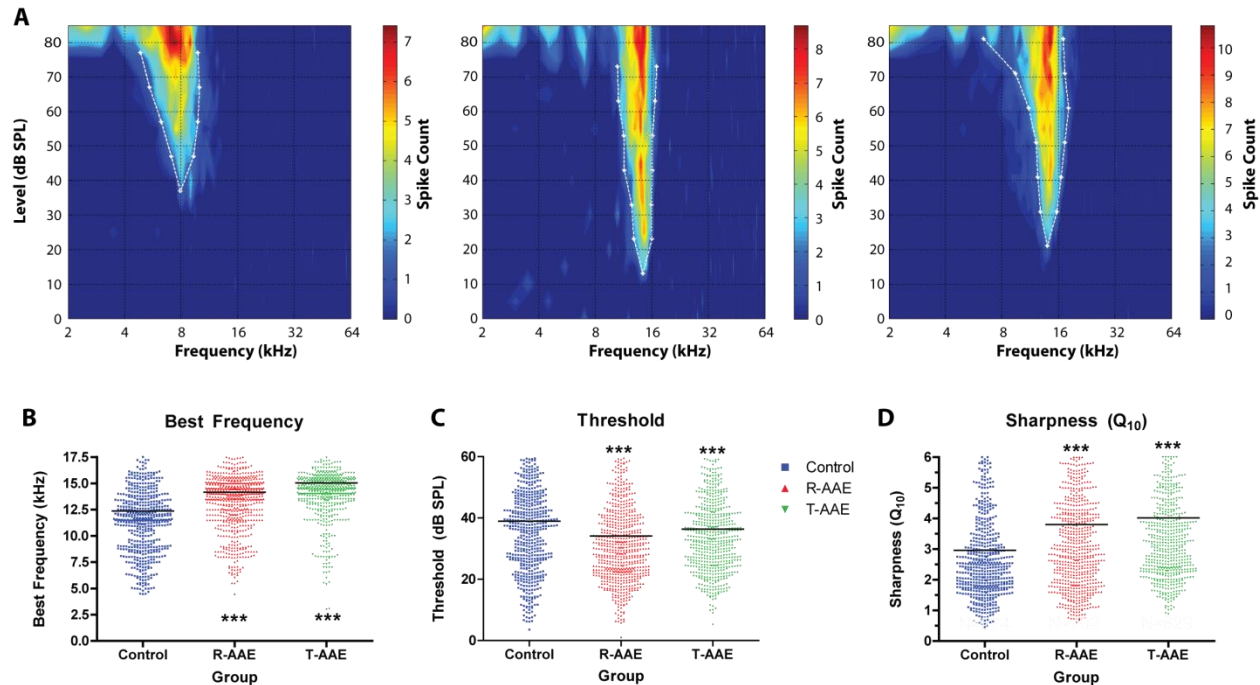

275

276 **Figure 3.** Exposure to AAE changes the frequency responses of IC units. **A**, Example frequency  
277 response areas (FRA) are shown from representative control, regular AAE-exposed and temporal  
278 AAE-exposed animals. Color-mapped counts indicate the number of spikes per frequency-level  
279 pair, with the legend shown on the right. Best frequency (BF) was automatically identified as the  
280 frequency with the lowest intensity of drive (minimum threshold, or MT). **B**, Mean best  
281 frequencies were significantly increased compared to controls following either type of AAE  
282 exposure (Reg. AAE:  $14.2 \pm 0.2$  kHz, Temporal AAE:  $15.1 \pm 0.2$  kHz, Control:  $12.4 \pm 0.2$  kHz;  $p$   
283  $< 0.001$ ). No significant difference was seen between AAE exposure types. **C**, Mean unit  
284 thresholds were significantly decreased following either type of AAE exposure (Reg. AAE:  $34.2$   
285  $\pm 0.6$  dB, Temporal AAE:  $35.9 \pm 0.5$  dB, Control:  $38.9 \pm 0.7$  dB;  $p < 0.01$ ). Again no significant  
286 difference was seen between AAE exposure types. **D**, Tuning sharpness was improved with both  
287 types of AAE exposure. Q-values computed at 10 dB as well as 20 dB, 30 dB and 40 dB above  
288 threshold (data not shown) were significantly increased compared to controls (one-way ANOVA  
289 with post-hoc testing,  $p < 0.001$  at all levels). No significant differences were seen between the  
290 two types of AAE exposure. Graphs in B, C and D were vertically scaled to demonstrate  
291 differences in the mean, and thus some data points above the maximum vertical axis value are not  
292 shown.

293 Temporal processing acuity was assessed via MGTs, a measure of neural coding of silent  
294 gaps embedded in noise. Representative post-stimulus time histograms (PSTHs) of single phasic  
295 units in response to different gap durations are shown in Figure 4. Minimum gap thresholds  
296 (MGTs) were computed for all phasic units, and units were included in each of the following  
297 analyses if the gap threshold for the condition was  $\leq 96$  ms (Figure 5). For gaps embedded in 80-  
298 dB noise carriers, one-way ANOVA demonstrated a significant effect of Exposure ( $F = 15.43$ ,  $p$   
299  $< 0.001$ ; Figure 5A). Both types of AAE exposure shortened MGTs relative to controls. The mean  
300 magnitude of improvement for the regular AAE exposure group was 4.89 ms (33%), and for the  
301 temporal AAE exposure group was 6.58 ms (44%). For 70-dB carriers, one-way ANOVA  
302 demonstrated a significant effect of Exposure ( $F = 12.49$ ,  $p < 0.001$ ). Again, both types of AAE  
303 exposure improved MGTs compared to controls, with greater average improvement seen by mice  
304 exposed to temporal AAE (8.10 ms) versus those exposed to regular AAE (5.11 ms). Post-hoc  
305 comparison did not show a significant difference between groups exposed to regular versus  
306 temporal AAE. For silent gaps embedded in 60-dB SPL carriers, one-way ANOVA demonstrated  
307 an effect of Exposure on MGT ( $F = 7.31$ ,  $p < 0.001$ ). Group comparisons showed that mice  
308 exposed to temporal AAE had significantly shorter MGTs compared to mice exposed to regular  
309 AAE (temporal AAE vs. regular AAE:  $15.9 \pm 1.2$  ms vs.  $23.3 \pm 1.6$  ms,  $p < 0.01$ ). Control mice  
310 also had shorter MGTs compared to mice exposed to regular AAE, though these differences did  
311 not reach significance (control vs. regular AAE:  $18.6 \pm 1.7$  ms vs.  $23.3 \pm 1.6$  ms). However, the  
312 number of units with detectable minimal gap thresholds was also substantially lower for control  
313 mice (96 units) than for either regular (170 units) or temporal (188 units) AAE-exposed mice ( $\chi^2(2)$   
314  $= 118.08$ ,  $p < 0.001$ ). In contrast with phasic units, tonic units showed no significant effects of  
315 AAE exposure on responses to gap stimuli or MGTs (data not shown). Overall, these findings

## Improved Temporal Processing Following AAE Exposure

20

316 indicate that gap detection generally improved in phasic units following exposure to both types of  
317 AAE, with a trend towards greater improvement seen following exposure to our novel temporal  
318 AAE.

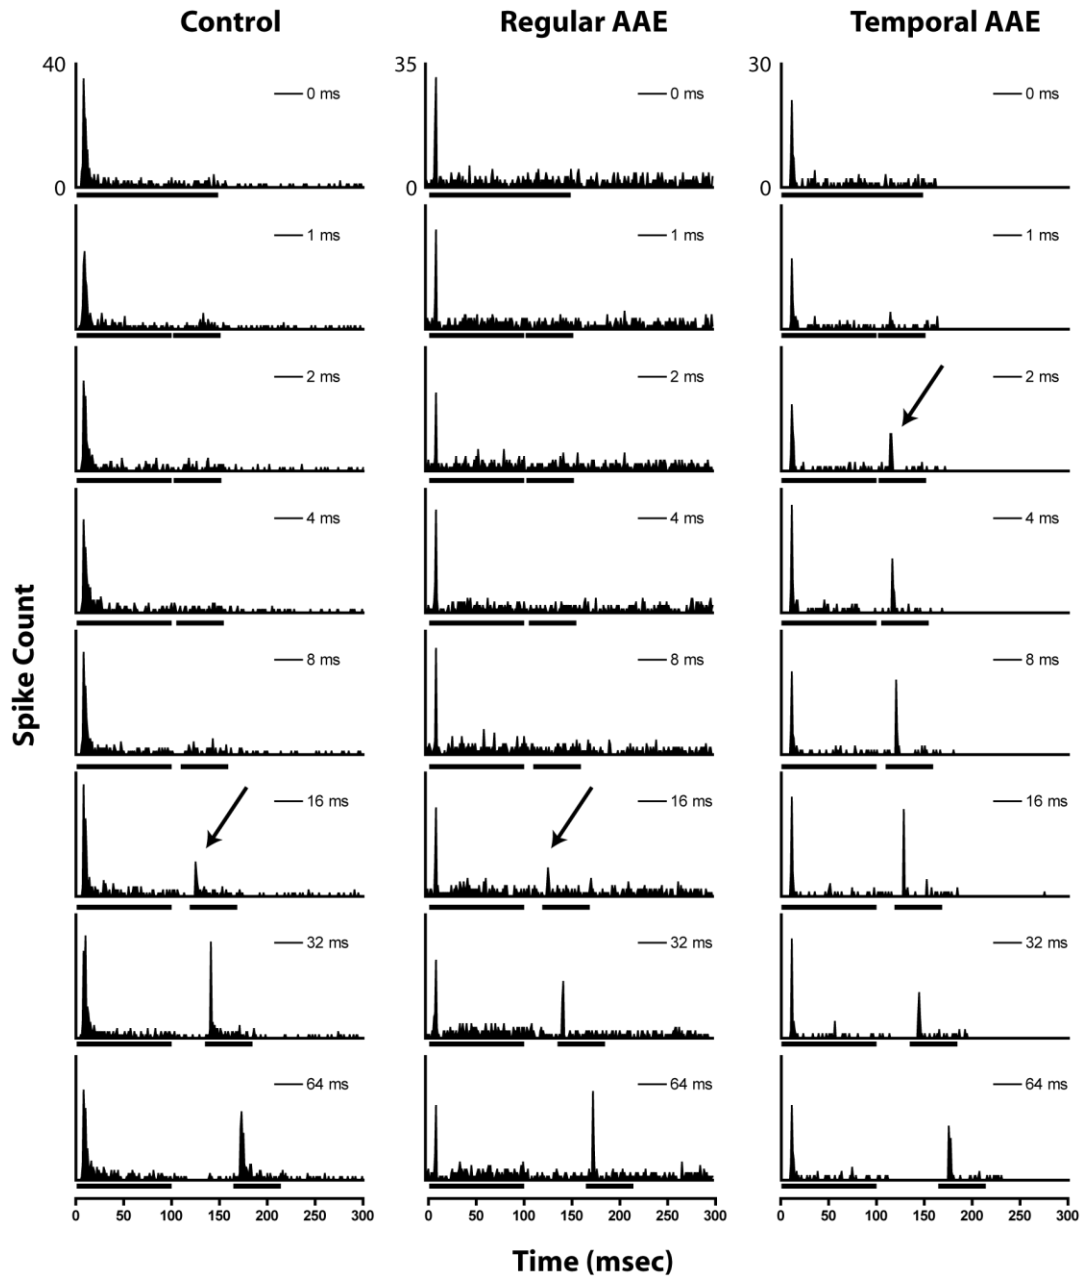

319

320 **Figure 4.** Representative examples of a neural correlate of gap encoding by phasic units from  
321 unexposed (*left*), regular AAE-exposed (*center*), and temporal AAE-exposed (*right*) mice. Post  
322 stimulus time histograms show spike counts summed over 50 presentation of a gap-in-noise  
323 paradigm using a carrier level of 80 dB SPL with gap duration shown in each PSTH. Bars under  
324 the x-axis denote noise-burst duration marking the silent gap. Arrows denote the automatically-  
325 calculated MGT for each unit.

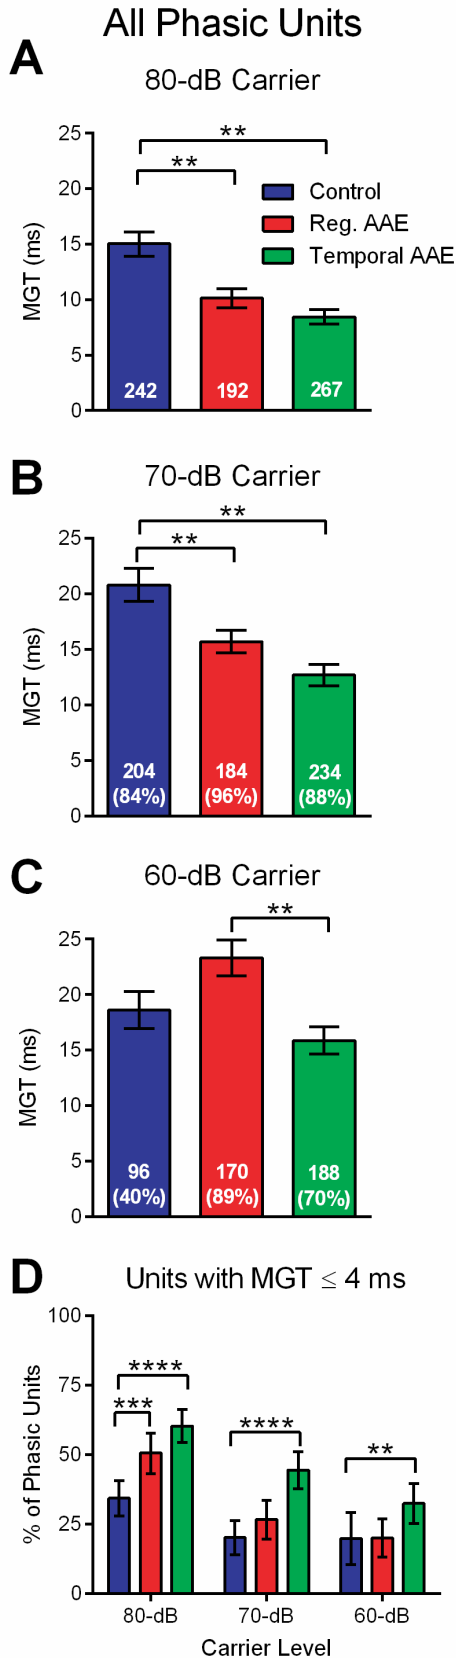

**Figure 5.** Exposure to both types of AAE improve mean gap thresholds in phasic units. Mean gap thresholds (MGTs) were computed across each group, for each noise carrier level (80, 70 & 60 dB). Total number of units in each group are shown at the bottom of the bar. **A**, At the 80-dB carrier level exposure to both types of AAE resulted in significantly shorter mean MGT (Control:  $15.0 \pm 1.1$  ms, Reg. AAE:  $10.1 \pm 0.9$ , Temporal AAE:  $8.4 \pm 0.7$  ms). **B**, At the 70-dB carrier level, exposure to both types of AAE again significantly shorten mean MGT, with greater improvement seen in the temporal AAE exposure group (Control:  $20.8 \pm 1.5$  ms, Reg. AAE:  $15.7 \pm 1.0$ , Temporal AAE:  $12.7 \pm 1.0$  ms). **C**, At the 60-dB carrier level the mean MGT from the temporal AAE group was significantly shorter than from the regular AAE group ( $15.9 \pm 1.2$  ms vs  $23.3 \pm 1.6$  ms,  $p < 0.01$ ). Additionally, the mean MGT for control mice was significantly shorter than from the regular AAE group ( $18.6 \pm 1.7$  ms vs  $23.3 \pm 1.6$  ms) but the number of responsive units was much less. Sample size is shown inside the bar, with the percent equal to the percent of all phasic responsive units to an 80-dB carrier. **D**, A significantly greater number of phasic units had MGTs  $\leq 4$  msec in mice exposed to temporal AAE, followed by those exposed to regular AAE, for all carrier levels, 80, 70 and 60 dB SPL (\*\* denotes  $p < 0.05$ , \*\*\*= $p < 0.001$ , \*\*\*\*= $p < 0.0001$  by Fischer exact test). The fraction of phasic units is displayed with  $\pm 95\%$  CI.



359           Gap detection is more challenging in background noise, and may also be a key marker of  
360 speech recognition difficulties in background noise<sup>39, 40</sup>. To determine whether this measure of  
361 temporal acuity improves following AAE exposure, only units that responded to gap stimuli  
362 (MGTs  $\leq 96$  ms) presented in continuous background noise (CBN) were included in the analysis  
363 (see Table 1 and Figure 6A, B). This subpopulation also showed improvement in MGTs for gap  
364 stimuli presented in quiet after either AAE exposure (One-way ANOVA:  $F = 18.16$ ,  $p < 0.001$ ;  
365 post-hoc regular and temporal AAE MGT  $<$  control,  $p < 0.001$ ; compare Figure 6A with Figure  
366 5A). A one-way ANOVA also showed a significant effect of Exposure on MGTs when stimuli  
367 were delivered in the presence of +6 dB SNR continuous background noise ( $F = 5.39$ ,  $p = 0.005$ ;  
368 Figure 6B). Exposure to temporal AAE significantly shortened MGTs compared to controls ( $12.7$   
369  $\pm 1.0$  ms vs.  $17.9 \pm 1.2$  ms,  $p < 0.01$ ), while exposure to regular AAE only trended towards shorter  
370 MGTs ( $14.6 \pm 1.2$  ms vs.  $17.9 \pm 1.2$  ms,  $p > 0.05$ ). These data indicate that early temporal AAE  
371 exposure improves gap detection in the presence of background noise for phasic units.

## Gap-Responsive in Noise

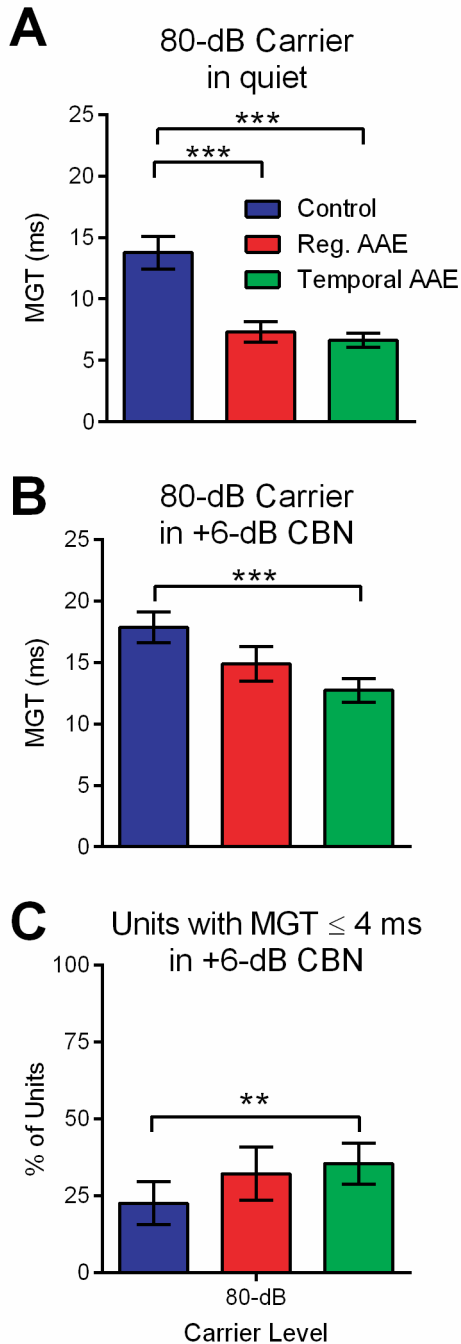

**Figure 6.** Exposure to temporal AAE preserves gap thresholds in the presence of continuous background noise (CBN). Only a subset of phasic units was responsive in background noise. **A**, Shown are the MGTs measured in response to an 80-dB carrier without CBN from only the units responsive in background noise. These results match those seen in Figure 5A where at 80-dB both types of AAE exposure resulted in significantly shorter MGT. **B**, The same units as in A, measured in response to an 80-dB carrier with +6 dB SNR CBN (background noise at 74 dB). Only exposure to temporal AAE resulted in significantly shorter gap thresholds compared to controls ( $12.7 \pm 1.0$  ms vs  $17.9 \pm 1.2$  ms,  $p < 0.01$ ). Sample size is given in each bar, with percent shown as a percent of all phasic responders at 80-dB. **C**, The percent of all responsive phasic units with MGTs  $\leq 4$  ms (sensitive responders) was increased in the temporal AAE group at all levels (\*\* denotes  $p < 0.05$  by Fischer exact test. The error bars show fraction of phasic units with  $\pm 95\%$  CI.

395           As our previous work suggests that behavioral gap thresholds are more strongly influenced  
396 by midbrain units with the shortest gap thresholds<sup>17</sup>, we computed the percent of responding units  
397 with gap thresholds  $\leq 4$  ms (Figure 6C). All phasic units with MGT  $\leq 96$  ms (those shown in  
398 Figure 5A-C) were included for this analysis. Temporal AAE-exposed mice had the greatest  
399 percent of phasic units that had short gap thresholds, regardless of carrier intensity. Thus, early  
400 temporal AAE strengthens encoding of short gap durations.

401

## 402 **Discussion**

403           In the present study, we have shown that exposure to a temporally-complex broadband  
404 AAE can modulate multiple aspects of peripheral and central auditory function in a mouse model  
405 of severe congenital SNHL. Early exposure to a novel, temporally-enriched broadband noise  
406 stimulus, starting before hearing onset, improved ABR thresholds, wave I ABR amplitudes and  
407 DPOAE amplitudes relative to normally-raised mice. The frequency range that showed the most  
408 improvement in cochlear function was within the region of maximal energy for the AAE exposure  
409 spectrum. Improvements in sensitivity and spectral encoding were also present in the CAS.  
410 Recordings in the auditory midbrain showed lower neural thresholds to sounds and better  
411 representation of higher frequencies following an enriched versus control environment.  
412 Importantly, neural gap detection improved in both quiet and background noise, indicating  
413 increased temporal processing acuity after this novel AAE intervention. Together these findings  
414 suggest that early exposure to temporally-modulated broadband noise stimuli can restrict the  
415 negative consequences of SNHL on peripheral function, and spectral and static temporal  
416 processing in the CAS.

417           Sensorineural damage in the cochlea decreases sensitivity and distorts auditory input from  
418 the periphery <sup>41</sup>. Consequent to this peripheral damage, a number of structural and  
419 neurophysiological changes occur in brainstem, midbrain, and cortical auditory brain regions <sup>42-51</sup>.  
420 Altered central auditory processing associated with SNHL, such high thresholds, loss of frequency  
421 representation, and broader tuning curves<sup>26, 52</sup>, may impair auditory signal detection and  
422 differentiation. Additionally, very early SNHL, experienced in DBA mice and infants with  
423 congenital SNHL, may interact with normal developmental timelines for central auditory  
424 processing to further impair sound processing beyond the direct consequences of SNHL. In normal  
425 hearing humans and rodents, temporal processing acuity, as measured by gap thresholds, improves  
426 during early development <sup>53, 54</sup>. Here we find deficits in neural correlates of gap detection in the  
427 auditory midbrain in 1-month old DBA mice relative to normal hearing strains <sup>17, 37</sup>. Thus, while  
428 SNHL in adulthood does not have profound effects on temporal processing in the auditory  
429 midbrain <sup>37</sup>, the current findings suggest that SNHL during development may strongly impact both  
430 spectral and temporal aspects of central auditory processing.

431           Previous work indicates that in young mice with progressive, congenital SNHL, early  
432 exposure to broadband AAE can preserve hearing sensitivity and limit hair cell loss <sup>26-28, 30, 55</sup>. This  
433 also appears to limit concomitant reorganization in the CAS, limiting the loss of neurons in the  
434 cochlear nucleus and sensitivity to high frequency sounds in the IC <sup>28, 30</sup>. Here we expand this  
435 characterization of central auditory processing after early temporally modulated broadband AAE  
436 exposure, finding that intervention can preserve both spectral and temporal acuity in the auditory  
437 midbrain. After AAE intervention with our novel temporally complex AAE, and to a lesser extent  
438 with a less complex broadband AAE, neural sound processing in the IC exhibited lower response  
439 thresholds, greater high frequency encoding, more narrow frequency response areas, and better

440 gap encoding and detection. Others have reported similar CAS plasticity following more general  
441 environmental enrichment with an auditory component. Recordings in the auditory cortex (AC)  
442 showed improved neural temporal response properties, increased spectral and temporal selectivity,  
443 and more narrow neural response fields<sup>56,57</sup>. The current findings continue to support the idea that  
444 both peripheral and central auditory processing can be modulated by enriched environments.

445         The plasticity of the CAS is remarkable across mammalian species. Like rodents, humans  
446 exposed to various types of passive AAE that alter sound input to the ear also undergo profound  
447 central auditory and perceptual changes resulting from neural plasticity. The effects of AAE on  
448 central auditory function, particularly in the face of hearing loss, may arise, at least in part, from  
449 homeostatic mechanisms that maintain neural activity (Turrigiano, 1999). Consistent with this  
450 idea, when sound input is attenuated via deprivation (i.e., via temporary earplug, or conductive  
451 hearing loss), the reduced peripheral input leads to increased central activity (see<sup>58</sup>). Subsequent  
452 (or concurrent) exposure to passive AAE is predicted to stabilize peripheral excitatory drive and  
453 preserve input to the CAS. By stabilizing the mean level of neural activity, AAE is predicted to  
454 counteract hearing loss-related increases in central gain, improving coding efficiency, and  
455 maintaining an optimal input-dependent dynamic range<sup>59</sup>. Indeed, perceptual changes in humans  
456 are observed following AAE that are consistent with normalized gain, including altered loudness  
457 perception<sup>60,61</sup>, and finer intensity resolution<sup>62</sup>. AAE may also help to maintain or expand sound  
458 representation in the face of deteriorating peripheral input through standard experience-  
459 dependent plasticity mechanisms. Humans show improved temporal coding following AAE<sup>63</sup>,  
460 which could arise from improved sound representation. In rodents, AAE can lead to  
461 reorganization in primary and non-primary auditory cortex as reflected in narrower response  
462 fields, improved temporal response properties, and increased spectral and temporal selectivity of

463 neurons<sup>57, 64</sup>.

464 Intriguingly, while both types of passive AAE employed in this study improved auditory  
465 sensitivity and spectral sound processing, our novel, temporally complex broadband AAE had a  
466 stronger positive influence on temporal processing acuity. This was particularly true for  
467 improvements in temporal processing with background noise. Thus, the benefits of early AAE  
468 exposure may be related to characteristics of the sound presented. Previous work showed that in  
469 young DBA mice, treatment with broadband AAE improved behavioral and neurophysiological  
470 measures of tonal thresholds<sup>26</sup>. In the present study, a similar, but temporally more complex,  
471 broadband AAE stimulus, improved both spectral and temporal sound processing. Band-limited  
472 AAE also slowed the progression of SNHL in the 16 to 32 kHz range, but did not ameliorate a loss  
473 of sensitivity at lower frequencies<sup>55</sup>. Likewise, the effect of AAE exposure is also shaped by  
474 auditory function and timing of the intervention. In mature auditory systems, or with normal  
475 hearing, some types of AAE exposure may instead lead to the suppression of sound sensitivity<sup>30,</sup>  
476<sup>65</sup>. Recently it was observed that young adult CBA mice exposed to 75 dB SPL AAE were found  
477 to display functional evidence of cochlear synaptopathy<sup>66</sup>. Likewise, in adult cats with normal  
478 hearing, tonal or band-limited AAE exposure profoundly suppressed AC activity in the frequency  
479 range of the exposure<sup>67-70</sup>.

480 Though the precise mechanism is unknown, early broadband AAE has a positive impact  
481 on cochlear health across a limited tonotopic range depending on the spectral composition of the  
482 AAE<sup>28</sup>. Improved cochlear function in turn supports lower thresholds and maintains frequency  
483 representation in the CAS. However, this study re-affirms that broadband AAE exposure invokes  
484 further adaptive neural plasticity in the auditory midbrain. Sharper IC neural tuning curves indicate  
485 that lateral inhibition is enhanced in the CAS following auditory enrichment. Moreover,

486 temporally complex AAE may not only strengthen inhibition, but also improve the timing of  
487 inhibition. Timed inhibition is key for shaping sound offset responses that subserve gap detection  
488 <sup>71-74</sup>. Since more spectrally complex signals evoke stronger sound offset responses, the broadband  
489 nature of the stimulus might be important, and may even be improved upon with a variable spectral  
490 component <sup>75</sup>. The possibility that temporal encoding can be altered by auditory experience was  
491 first confirmed by Kilgard and Merzenich <sup>43</sup>, who demonstrated that the ability of AC neurons to  
492 follow high frequency sound stimuli can be improved if high frequency sound stimuli are paired  
493 with electrical stimulation of the nucleus basalis. The improvement in neural encoding and  
494 detection of gaps in noise in the current study shows that even passive sound exposure may shape  
495 temporal acuity, though it seems unlikely that this occurs through pathways involving the nucleus  
496 basalis.

497 Overall, the current findings suggest that temporally-complex AAE interventions may  
498 provide functional benefits in individuals with SNHL, especially newborns diagnosed with hearing  
499 loss. The improved neural encoding of short gap durations in the IC is likely to support functional  
500 improvements in gap detection, as these measures are strongly associated <sup>17</sup>. In turn, improved gap  
501 detection, particularly in noise, counteracts an aspect of hidden hearing loss that impairs speech  
502 perception in daily life <sup>12</sup>. Though not specific to the temporally complex AAE intervention, better  
503 frequency representation and sharper spectral tuning that occurs after AAE may also bolster  
504 auditory signal detection and differentiation. These findings support the possibility that AAE may  
505 be targeted, based on the properties of the AAE as well as the listener, to better improve hearing  
506 deficits. The ability of our novel, temporally complex broadband AAE exposure to improve neural  
507 correlates of SNHL provides direct bench-to-bedside promise for treating congenital SNHL.

508 **References**

- 509 1. Elden, L.M. & Potsic, W.P. Screening and prevention of hearing loss in children. *Curr*  
510 *Opin Pediatr* **14**, 723-730 (2002).
- 511 2. Davidson, J., Hyde, M.L. & Alberti, P.W. Epidemiologic patterns in childhood hearing  
512 loss: a review. *Int J Pediatr Otorhinolaryngol* **17**, 239-266 (1989).
- 513 3. Dalzell, L., *et al.* The New York State universal newborn hearing screening  
514 demonstration project: ages of hearing loss identification, hearing aid fitting, and  
515 enrollment in early intervention. *Ear Hear* **21**, 118-130 (2000).
- 516 4. Picton, T.W., Taylor, M.J. & Durieux-Smith, A. Brainstem Auditory Evoked Potentials  
517 in Infants and Children. in *Electrodiagnosis in Clinical Neurology* (ed. M.J. Aminoff)  
518 525-552 (Churchill Livingstone, Philadelphia, 2005).
- 519 5. Wake, M., Hughes, E.K., Poulakis, Z., Collins, C. & Rickards, F.W. Outcomes of  
520 children with mild-profound congenital hearing loss at 7 to 8 years: a population study.  
521 *Ear Hear* **25**, 1-8 (2004).
- 522 6. Needleman, A.R. & Crandell, C.C. Speech recognition in noise by hearing-impaired and  
523 noise-masked normal-hearing listeners. *J Am Acad Audiol* **6**, 414-424 (1995).
- 524 7. Yoshinaga-Itano, C., Sedey, A.L., Coulter, D.K. & Mehl, A.L. Language of early- and  
525 later-identified children with hearing loss. *Pediatrics* **102**, 1161-1171 (1998).
- 526 8. Yoshinaga-Itano, C. From Screening to Early Identification and Intervention:  
527 Discovering Predictors to Successful Outcomes for Children With Significant Hearing  
528 Loss. *J Deaf Stud Deaf Educ* **8**, 11-30 (2003).
- 529 9. Yoshinaga-Itano, C. Early intervention after universal neonatal hearing screening: impact  
530 on outcomes. *Ment Retard Dev Disabil Res Rev* **9**, 252-266 (2003).
- 531 10. Snell, K.B. Age-related changes in temporal gap detection. *J Acoust Soc Am* **101**, 2214-  
532 2220 (1997).
- 533 11. Elangovan, S. & Stuart, A. Natural boundaries in gap detection are related to categorical  
534 perception of stop consonants. *Ear Hear* **29**, 761-774 (2008).
- 535 12. Snell, K.B., Mapes, F.M., Hickman, E.D. & Frisina, D.R. Word recognition in competing  
536 babble and the effects of age, temporal processing, and absolute sensitivity. *J Acoust Soc*  
537 *Am* **112**, 720-727 (2002).
- 538 13. Trehub, S.E. & Henderson, J.L. Temporal resolution in infancy and subsequent language  
539 development. *J Speech Hear Res* **39**, 1315-1320 (1996).
- 540 14. Benasich, A.A. & Tallal, P. Infant discrimination of rapid auditory cues predicts later  
541 language impairment. *Behav Brain Res* **136**, 31-49 (2002).
- 542 15. Giraudi, D., Salvi, R., Henderson, D. & Hamernik, R. Gap detection by the chinchilla. *J*  
543 *Acoust Soc Am* **68**, 802-806 (1980).
- 544 16. Hamann, I., Gleich, O., Klump, G.M., Kittel, M.C. & Strutz, J. Age-dependent changes  
545 of gap detection in the Mongolian gerbil (*Meriones unguiculatus*). *J Assoc Res*  
546 *Otolaryngol* **5**, 49-57 (2004).



- 547 17. Barsz, K., Ison, J.R., Snell, K.B. & Walton, J.P. Behavioral and neural measures of  
548 auditory temporal acuity in aging humans and mice. *Neurobiol Aging* **23**, 565-578  
549 (2002).
- 550 18. Beck, J.A., *et al.* Genealogies of mouse inbred strains. *Nat Genet* **24**, 23-25 (2000).
- 551 19. Noben-Trauth, K., Zheng, Q.Y. & Johnson, K.R. Association of cadherin 23 with  
552 polygenic inheritance and genetic modification of sensorineural hearing loss. *Nat Genet*  
553 **35**, 21-23 (2003).
- 554 20. Johnson, K.R., Longo-Guess, C., Gagnon, L.H., Yu, H. & Zheng, Q.Y. A locus on distal  
555 chromosome 11 (ahl8) and its interaction with Cdh23 ahl underlie the early onset, age-  
556 related hearing loss of DBA/2J mice. *Genomics* **92**, 219-225 (2008).
- 557 21. Shin, J.B., *et al.* The R109H variant of fascin-2, a developmentally regulated actin  
558 crosslinker in hair-cell stereocilia, underlies early-onset hearing loss of DBA/2J mice. *J*  
559 *Neurosci* **30**, 9683-9694 (2010).
- 560 22. Ralls, K. Auditory sensitivity in mice, *Peromyscus* and *Mus musculus*. *Anim Behav* **15**,  
561 123-128 (1967).
- 562 23. Erway, L.C., Willott, J.F., Archer, J.R. & Harrison, D.E. Genetics of age-related hearing  
563 loss in mice: I. Inbred and F1 hybrid strains. *Hear Res* **65**, 125-132 (1993).
- 564 24. Willott, J.F., Kulig, J. & Satterfield, T. The acoustic startle response in DBA/2 and  
565 C57BL/6 mice: relationship to auditory neuronal response properties and hearing  
566 impairment. *Hear Res* **16**, 161-167 (1984).
- 567 25. Parham, K., Gerber, A., McKowen, A., Sun, X.M. & Kim, D.O. Distortion product  
568 otoacoustic emissions of the DBA/2J mouse with early-onset progressive hearing loss. in  
569 *J Assoc Res Otolaryngol* **775** (1997).
- 570 26. Turner, J.G. & Willott, J.F. Exposure to an augmented acoustic environment alters  
571 auditory function in hearing-impaired DBA/2J mice. *Hear Res* **118**, 101-113 (1998).
- 572 27. Willott, J.F. & Turner, J.G. Prolonged exposure to an augmented acoustic environment  
573 ameliorates age-related auditory changes in C57BL/6J and DBA/2J mice. *Hear Res* **135**,  
574 78-88 (1999).
- 575 28. Willott, J.F., Bross, L.S. & McFadden, S. Ameliorative effects of exposing DBA/2J mice  
576 to an augmented acoustic environment on histological changes in the cochlea and  
577 anteroventral cochlear nucleus. *J Assoc Res Otolaryngol* **6**, 234-243 (2005).
- 578 29. Willott, J.F., Vandenbosche, J. & Shimizu, T. Effects of a high-frequency augmented  
579 acoustic environment on parvalbumin immunolabeling in the anteroventral cochlear  
580 nucleus of DBA/2J and C57BL/6J mice. *Hear Res* **261**, 36-41 (2010).
- 581 30. Willott, J.F. & Turner, J.G. Neural plasticity in the mouse inferior colliculus: relationship  
582 to hearing loss, augmented acoustic stimulation, and prepulse inhibition. *Hear Res* **147**,  
583 275-281 (2000).
- 584 31. Willott, J.F., Turner, J.G. & Sundin, V.S. Effects of exposure to an augmented acoustic  
585 environment on auditory function in mice: roles of hearing loss and age during treatment.  
586 *Hear Res* **142**, 79-88 (2000).

- 587 32. Willott, J.F., Demuth, R.M., Lu, S.M. & Van Bergem, P. Abnormal tonotopic  
588 organization in the ventral cochlear nucleus of the hearing-impaired DBA/2 mouse.  
589 *Neurosci Lett* **34**, 13-17 (1982).
- 590 33. Shnerson, A. & Pujol, R. Development: anatomy, electrophysiology, and behavior. in  
591 *Auditory Psychobiology of the Mouse* (ed. J.F. Willott) 395-425 (Charles C. Thomas,  
592 Springfield, IL, 1983).
- 593 34. Cheeseman, P. & Stutz, J. Bayesian Classification(AutoClass):Theory and Results.  
594 *Advances in Knowledge Discovery and Data Mining* (1997).
- 595 35. Kirby, A.E. & Middlebrooks, J.C. Unanesthetized auditory cortex exhibits multiple codes  
596 for gaps in cochlear implant pulse trains. *J Assoc Res Otolaryngol* **13**, 67-80 (2012).
- 597 36. Leong, U.C., Barsz, K., Allen, P.D. & Walton, J.P. Neural correlates of age-related  
598 declines in frequency selectivity in the auditory midbrain. *Neurobiol Aging* (2009).
- 599 37. Walton, J.P., Barsz, K. & Wilson, W.W. Sensorineural hearing loss and neural correlates  
600 of temporal acuity in the inferior colliculus of the C57BL/6 mouse. *J Assoc Res*  
601 *Otolaryngol* **9**, 90-101 (2008).
- 602 38. Walton, J.P., Frisina, R.D. & O'Neill, W.E. Age-related alteration in processing of  
603 temporal sound features in the auditory midbrain of the CBA mouse. *J Neurosci* **18**,  
604 2764-2776 (1998).
- 605 39. Pichora-Fuller, M.K., Schneider, B.A., Benson, N.J., Hamstra, S.J. & Storzer, E. Effect  
606 of age on detection of gaps in speech and nonspeech markers varying in duration and  
607 spectral symmetry. *J Acoust Soc Am* **119**, 1143-1155 (2006).
- 608 40. Snell, K.B. & Frisina, D.R. Relationships among age-related differences in gap detection  
609 and word recognition. *J Acoust Soc Am* **107**, 1615-1626 (2000).
- 610 41. Schmiedt, R.A. The Physiology of Cochlear Presbycusis. in *The Aging Auditory System*  
611 (ed. S. Gordon-Salant, R.D. Frisina, A.N. Popper & R.R. Fay) (Springer Science, 2010).
- 612 42. Frisina, R.D. & Walton, J.P. Age-related structural and functional changes in the cochlear  
613 nucleus. *Hear Res* **216-217**, 216-223 (2006).
- 614 43. Kilgard, M.P. & Merzenich, M.M. Plasticity of temporal information processing in the  
615 primary auditory cortex. *Nat Neurosci* **1**, 727-731 (1998).
- 616 44. Helfert, R.H., Sommer, T.J., Meeks, J., Hofstetter, P. & Hughes, L.F. Age-related  
617 synaptic changes in the central nucleus of the inferior colliculus of Fischer-344 rats. *J*  
618 *Comp Neurol* **406**, 285-298 (1999).
- 619 45. Casey, M.A. The effects of aging on neuron number in the rat superior olivary complex.  
620 *Neurobiol Aging* **11**, 391-394 (1990).
- 621 46. Helfert, R.H., Krenning, J., Wilson, T.S. & Hughes, L.F. Age-related synaptic changes in  
622 the anteroventral cochlear nucleus of Fischer-344 rats. *Hear Res* **183**, 18-28 (2003).
- 623 47. Krenning, J., Hughes, L.F., Caspary, D.M. & Helfert, R.H. Age-related glycine receptor  
624 subunit changes in the cochlear nucleus of Fischer-344 rats. *Laryngoscope* **108**, 26-31  
625 (1998).

- 626 48. Wang, Y. & Manis, P.B. Synaptic transmission at the cochlear nucleus endbulb synapse  
627 during age-related hearing loss in mice. *J Neurophysiol* **94**, 1814-1824 (2005).
- 628 49. Caspary, D.M., Ling, L., Turner, J.G. & Hughes, L.F. Inhibitory neurotransmission,  
629 plasticity and aging in the mammalian central auditory system. *J Exp Biol* **211**, 1781-  
630 1791 (2008).
- 631 50. Gleich, O., Dooling, R.J. & Manley, G.A. Inner-ear abnormalities and their functional  
632 consequences in Belgian Waterslager canaries (*Serinus canarius*). *Hear Res* **79**, 123-136  
633 (1994).
- 634 51. Caspary, D.M., Raza, A., Lawhorn Armour, B.A., Pippin, J. & Arneric, S.P.  
635 Immunocytochemical and neurochemical evidence for age-related loss of GABA in the  
636 inferior colliculus: implications for neural presbycusis. *J Neurosci* **10**, 2363-2372 (1990).
- 637 52. Barsz, K., Wilson, W.W. & Walton, J.P. Reorganization of receptive fields following  
638 hearing loss in inferior colliculus neurons. *Neuroscience* **147**, 532-545 (2007).
- 639 53. Trehub, S.E., Schneider, B.A. & Henderson, J.L. Gap detection in infants, children, and  
640 adults. *J Acoust Soc Am* **98**, 2532-2541 (1995).
- 641 54. Friedman, J.T., Peiffer, A.M., Clark, M.G., Benasich, A.A. & Fitch, R.H. Age and  
642 experience-related improvements in gap detection in the rat. *Brain Res Dev Brain Res*  
643 **152**, 83-91 (2004).
- 644 55. Willott, J.F., Bosch, J.V., Shimizu, T. & Ding, D.L. Effects of exposing DBA/2J mice to  
645 a high-frequency augmented acoustic environment on the cochlea and anteroventral  
646 cochlear nucleus. *Hear Res* **216-217**, 138-145 (2006).
- 647 56. Cai, R., *et al.* Environmental enrichment improves behavioral performance and auditory  
648 spatial representation of primary auditory cortical neurons in rat. *Neurobiol Learn Mem*  
649 **91**, 366-376 (2009).
- 650 57. Jakkamsetti, V., Chang, K.Q. & Kilgard, M.P. Reorganization in processing of spectral  
651 and temporal input in the rat posterior auditory field induced by environmental  
652 enrichment. *J Neurophysiol* **107**, 1457-1475 (2012).
- 653 58. Norena, A.J. & Farley, B.J. Tinnitus-related neural activity: theories of generation,  
654 propagation, and centralization. *Hear Res* **295**, 161-171 (2013).
- 655 59. Eggermont, J.J. Hearing loss, hyperacusis, or tinnitus: what is modeled in animal  
656 research? *Hear Res* **295**, 140-149 (2013).
- 657 60. Formby, C., Sherlock, L.P. & Gold, S.L. Adaptive plasticity of loudness induced by  
658 chronic attenuation and enhancement of the acoustic background. *J Acoust Soc Am* **114**,  
659 55-58 (2003).
- 660 61. Munro, K.J., Turtle, C. & Schaette, R. Plasticity and modified loudness following short-  
661 term unilateral deprivation: evidence of multiple gain mechanisms within the auditory  
662 system. *J Acoust Soc Am* **135**, 315-322 (2014).
- 663 62. Philibert, B., Collet, L., Vesson, J.F. & Veuillet, E. Intensity-related performances are  
664 modified by long-term hearing aid use: a functional plasticity? *Hear Res* **165**, 142-151  
665 (2002).

- 666 63. Gabriel, D., Veillet, E., Vesson, J.F. & Collet, L. Rehabilitation plasticity: influence of  
667 hearing aid fitting on frequency discrimination performance near the hearing-loss cut-off.  
668 *Hear Res* **213**, 49-57 (2006).
- 669 64. Cai, R., *et al.* Maintenance of enriched environment-induced changes of auditory spatial  
670 sensitivity and expression of GABAA, NMDA, and AMPA receptor subunits in rat  
671 auditory cortex. *Neurobiol Learn Mem* **94**, 452-460 (2010).
- 672 65. de Villers-Sidani, E., Chang, E.F., Bao, S. & Merzenich, M.M. Critical period window  
673 for spectral tuning defined in the primary auditory cortex (A1) in the rat. *J Neurosci* **27**,  
674 180-189 (2007).
- 675 66. Pienkowski, M. Rationale and Efficacy of Sound Therapies for Tinnitus and Hyperacusis.  
676 *Neuroscience* **407**, 120-134 (2019).
- 677 67. Pienkowski, M., Munguia, R. & Eggermont, J.J. Passive exposure of adult cats to  
678 bandlimited tone pip ensembles or noise leads to long-term response suppression in  
679 auditory cortex. *Hear Res* **277**, 117-126 (2011).
- 680 68. Pienkowski, M. & Eggermont, J.J. Long-term, partially-reversible reorganization of  
681 frequency tuning in mature cat primary auditory cortex can be induced by passive  
682 exposure to moderate-level sounds. *Hear Res* **257**, 24-40 (2009).
- 683 69. Pienkowski, M. & Eggermont, J.J. Intermittent exposure with moderate-level sound  
684 impairs central auditory function of mature animals without concomitant hearing loss.  
685 *Hear Res* **261**, 30-35 (2010).
- 686 70. Pienkowski, M. & Eggermont, J.J. Passive exposure of adult cats to moderate-level tone  
687 pip ensembles differentially decreases AI and AII responsiveness in the exposure  
688 frequency range. *Hear Res* **268**, 151-162 (2010).
- 689 71. Walton, J.P. Timing is everything: temporal processing deficits in the aged auditory  
690 brainstem. *Hear Res* **264**, 63-69 (2010).
- 691 72. Weible, A.P., *et al.* Perceptual gap detection is mediated by gap termination responses in  
692 auditory cortex. *Curr Biol* **24**, 1447-1455 (2014).
- 693 73. Anderson, L.A. & Linden, J.F. Mind the Gap: Two Dissociable Mechanisms of Temporal  
694 Processing in the Auditory System. *J Neurosci* **36**, 1977-1995 (2016).
- 695 74. Kopp-Scheinflug, C., Sinclair, J.L. & Linden, J.F. When Sound Stops: Offset Responses  
696 in the Auditory System. *Trends Neurosci* **41**, 712-728 (2018).
- 697 75. Akimov, A.G., Egorova, M.A. & Ehret, G. Spectral summation and facilitation in on- and  
698 off-responses for optimized representation of communication calls in mouse inferior  
699 colliculus. *Eur J Neurosci* **45**, 440-459 (2017).

700
